# Supplementary material
Source: Elsevier journal article supplement (https://www.sciencedirect.com/science/article/pii/S2531043720302269)
Supplement: mmc1 [file S2531043720302269:mmc1.docx]

# Supplemental video legends.

# Supplemental video. Videos with sound of droplet dispersion after cough when not utilizing (A) and utilizing supplemental oxygen via nasal cannula (B) and HFNC (C) and with an appropriately placed medical mask when not utilizing (D) and utilizing supplemental oxygen delivered by nasal cannula (E) and HFNC (F).

# HFNC = high-flow nasal cannula
